# Supplementary material for: A Recyclable Magnetic Aminated Lignin Supported Zr-La Dual-Metal Hydroxide for Rapid Separation and Highly Efficient Sequestration of Phosphate
Source: MDPI journal article supplement (doi:10.3390/molecules28072923), 2023-03-24
Supplement: s1 [file s1]

# **A Recyclable Magnetic Aminated Lignin Supported Zr-La Dual-Metal Hydroxide for Rapid Separation and Highly Efficient Sequestration of Phosphate**

**Enmin Zong <sup>1,2</sup>, Xuanren Wang <sup>1</sup>, Lirong Zhang <sup>1</sup>, Jiayao Yang <sup>3</sup> and Xiaohuan Liu <sup>1,\*</sup>**

<sup>1</sup> College of Life Science, Zhejiang Provincial Key Laboratory of Plant Evolutionary Ecology and Conservation, Taizhou University, 1139 Shifu Street, Taizhou 318000, China; zongenmin@tzc.edu.cn (E.Z.); 2131340013@tzc.edu.cn (X.W.); 2131340030@tzc.edu.cn (L.Z.)

<sup>2</sup> School of Earth Science and Engineering, Nanjing University, Nanjing 210093, China

<sup>3</sup> School of Biological and Chemical Engineering, Zhejiang University of Science and Technology, Hangzhou 310023, China; jiayao\_yang@zust.edu.cn

\* Correspondence: liuxh@tzc.edu.cn

Equation:

$$R_L = \frac{1}{1 + bC_0} \quad (1)$$

where  $C_0$  represents the initial concentration of phosphate in aqueous medium and  $b$  represents the Langmuir equilibrium constant. The value of  $R_L$  shows an indication for the feasibility of the adsorption process to proceed: irreversible ( $R_L = 0$ ), suitable ( $0 < R_L < 1$ ), linear ( $R_L = 1$ ), or unsuitable ( $R_L > 1$ ), respectively.

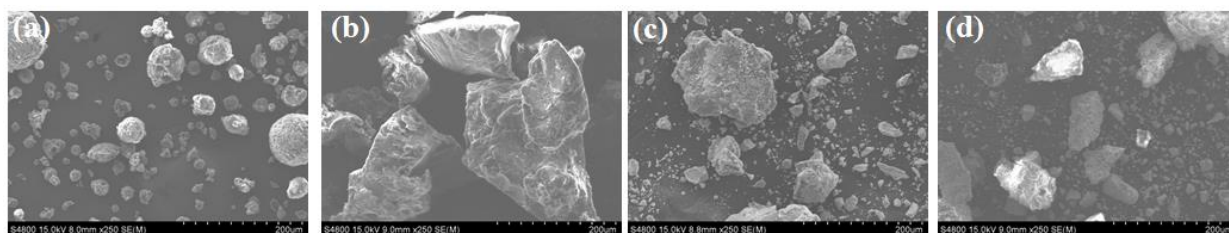

**Figure S1.** SEM images for (a) LG, (b) LG-NH<sub>2</sub>, (c) LG-NH<sub>2</sub>@Fe<sub>3</sub>O<sub>4</sub>, and (d) LG-NH<sub>2</sub>@Fe<sub>3</sub>O<sub>4</sub>@Zr-La.

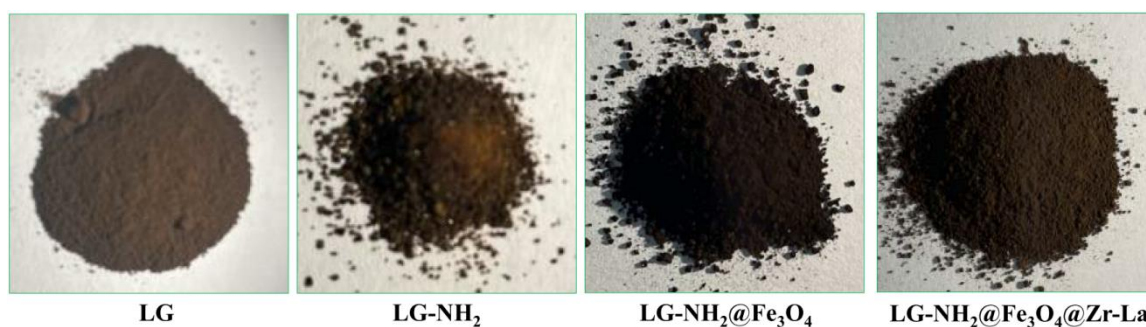

**Figure S2.** Digital images of different materials.

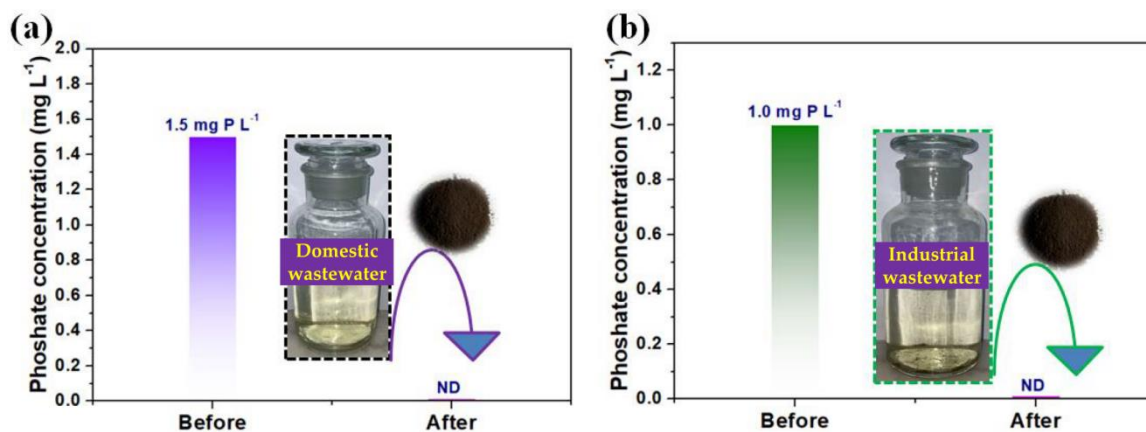

**Figure S3.** Changes in phosphate concentrations of two sewage samples before and after treatment by LG-NH<sub>2</sub>@Fe<sub>3</sub>O<sub>4</sub>@Zr-La (ND: Not detected).

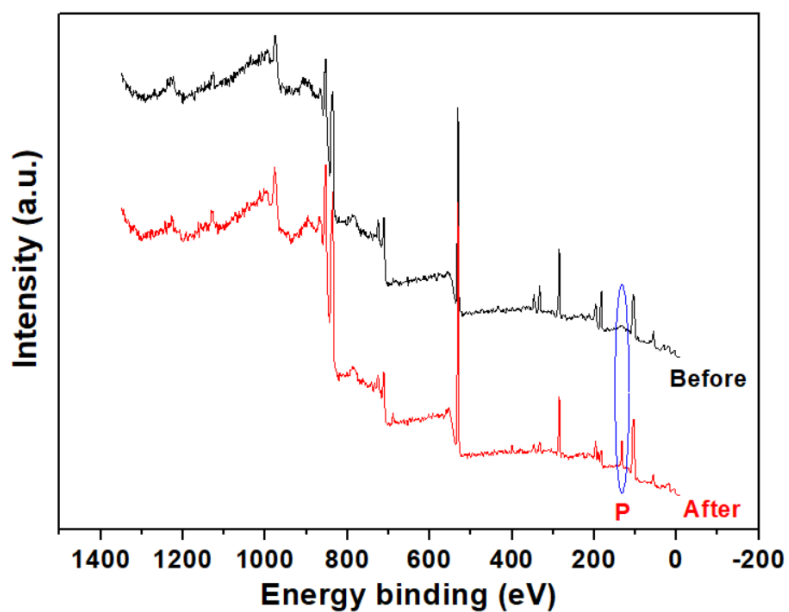

**Figure S4.** The wide-scan XPS spectra of LG-NH<sub>2</sub>@Fe<sub>3</sub>O<sub>4</sub>@Zr-La before and after phosphate adsorption.

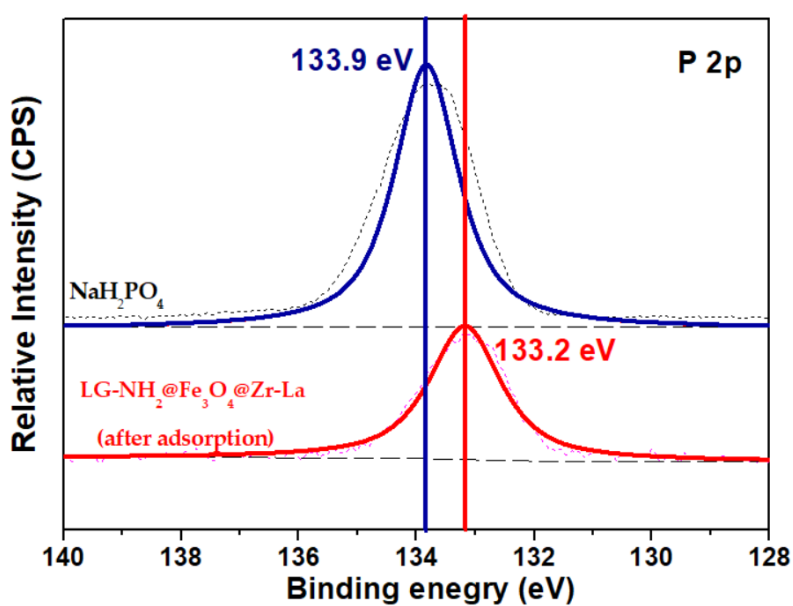

**Figure S5.** XPS analysis of the P 2p spectral.

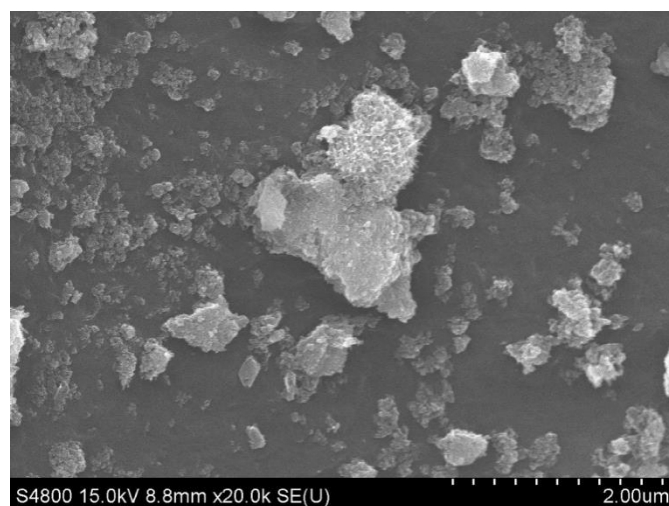

**Figure S6.** SEM image of the phosphate adsorbed-material.

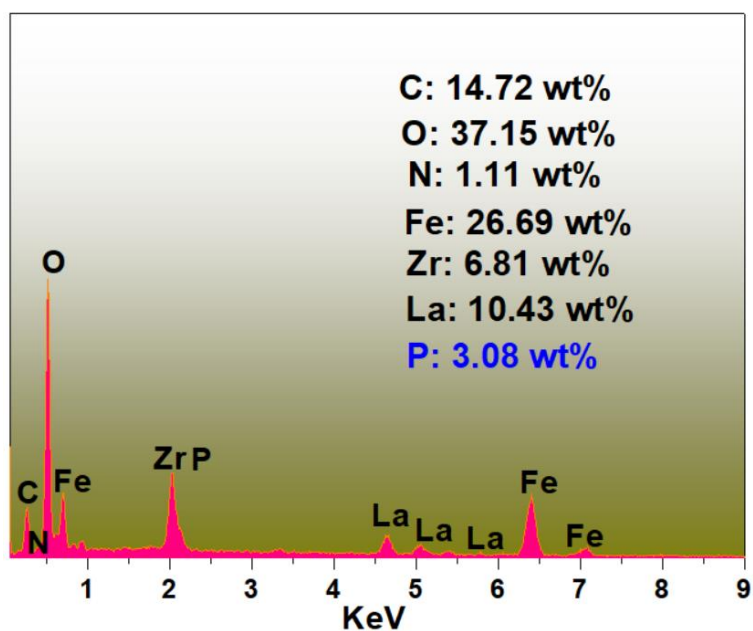

**Figure S7.** EDX spectrum of phosphate adsorbed-material.

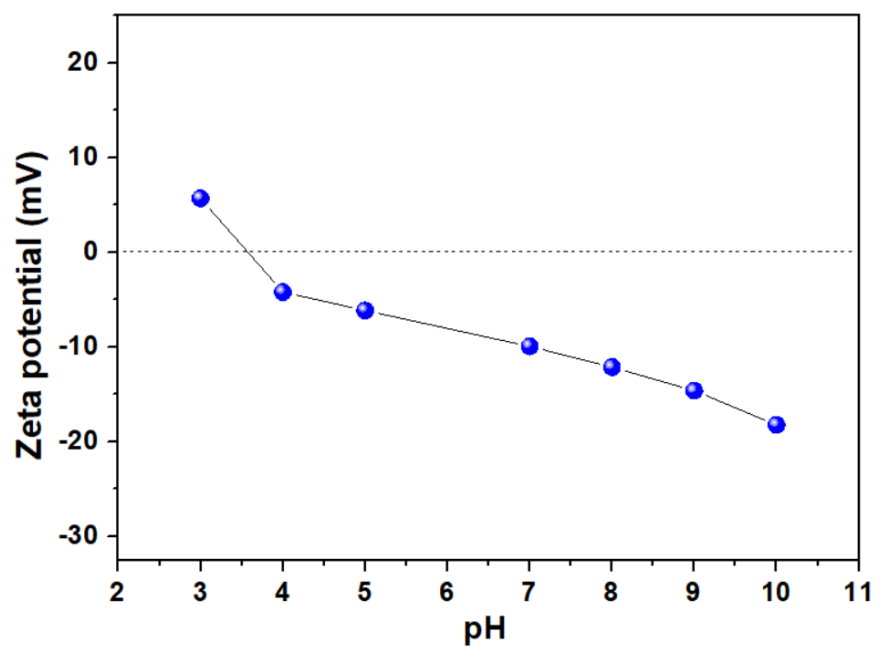

Figure S8. Zeta potential in response to pH change.
